# Supplementary material for: Hybrids of Reduced Graphene Oxide Aerogel and CNT for Electrochemical O2 Reduction
Source: MDPI journal article supplement (doi:10.3390/catal11111404), 2021-11-20
Supplement: s1 [file s1]

## Supplementary information

Hybrids of reduced graphene oxide aerogel and CNT for electrochemical O<sub>2</sub> reduction

Javier Hernández-Ferrer, A. Benito, W. Maser, Enrique García-Bordejé<sup>a\*</sup>,

<sup>a</sup>Instituto de Carboquímica (ICB-CSIC), Miguel Luesma Castán 4, E-50018  
Zaragoza, Spain, jegarcia@icb.csic.es

---

\* Corresponding author: Tel.: + 34 976733977; fax.: +34 976733318 *E-mail address:* jegarcia@icb.csic.es

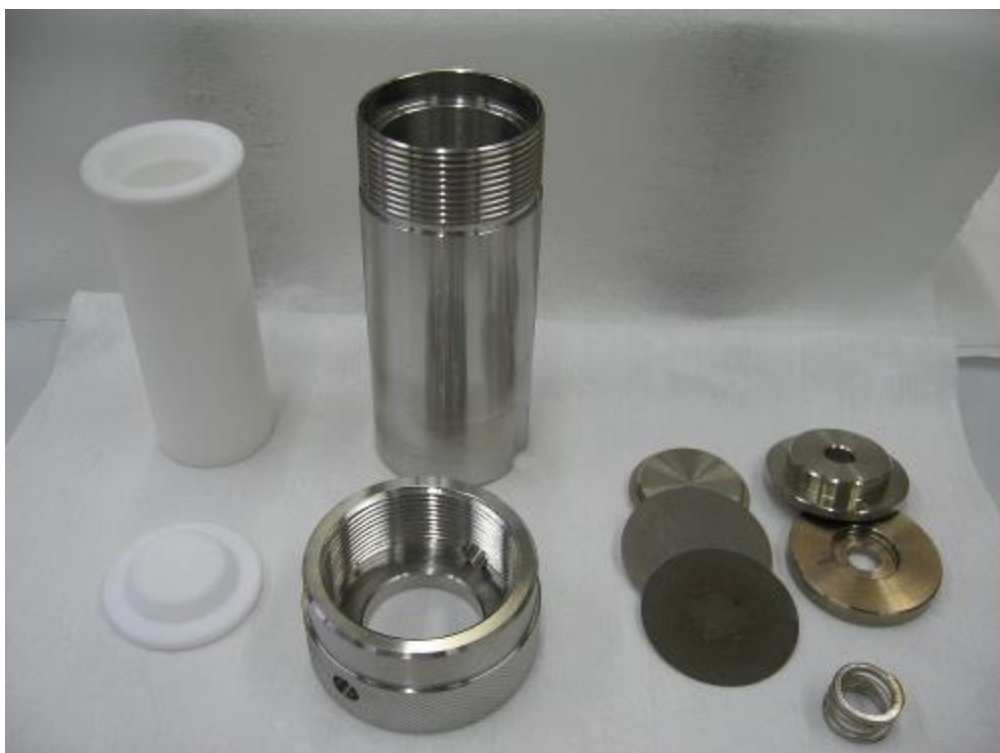

Figure S1. Autoclave used for the preparation of aerogels

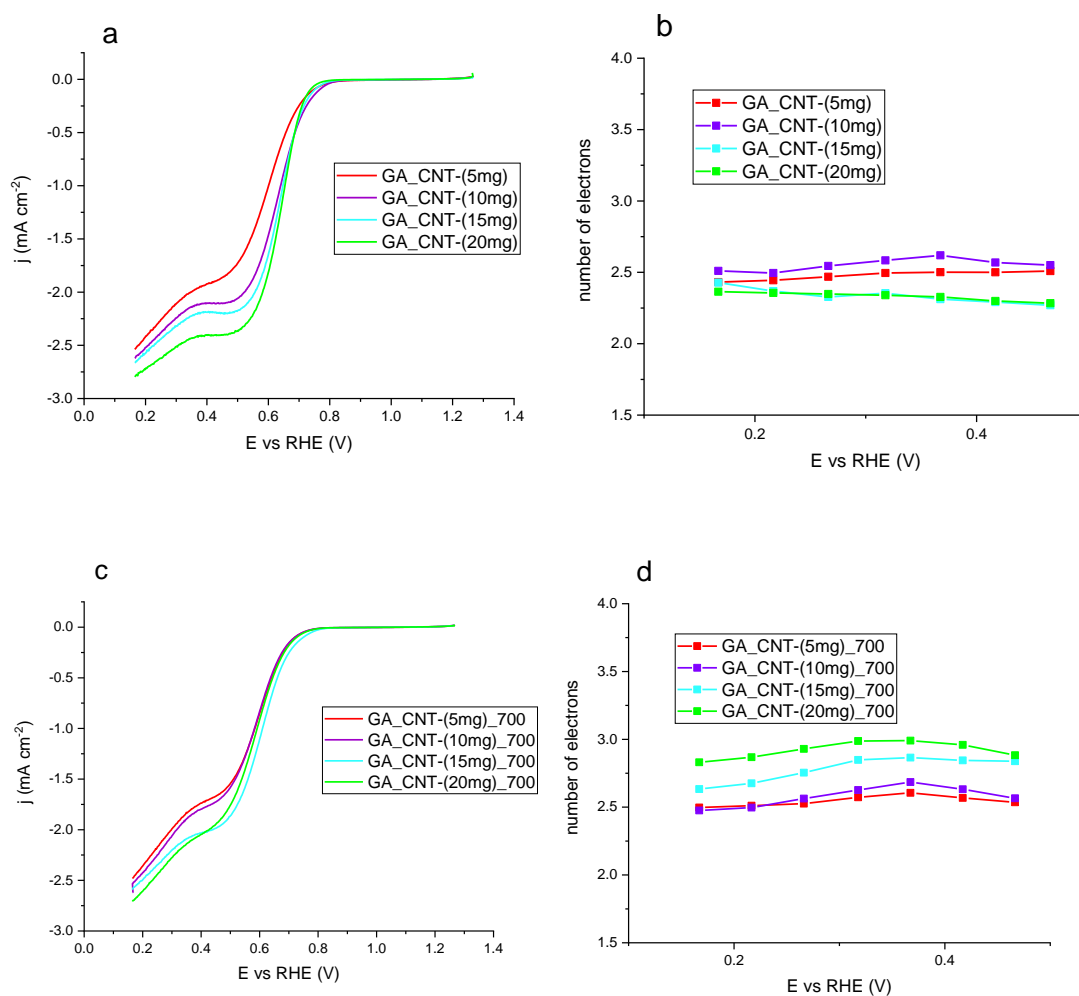

Figure S2. LSV polarization curves (a,c) and number of electrons exchanged of GA-CNT hybrids with different amounts of CNT before as synthesised (a,b) and after pyrolyzing at 700 °C (c,d).

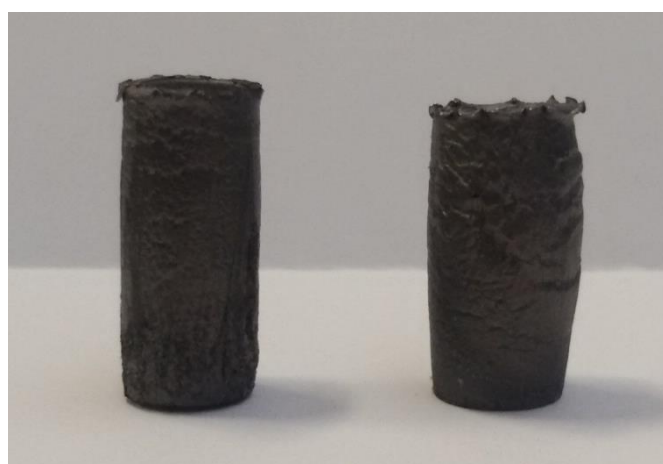

Figure S3. Digital photograph of graphene aerogel (GA) at the left and hybrid GA-CNT at the right

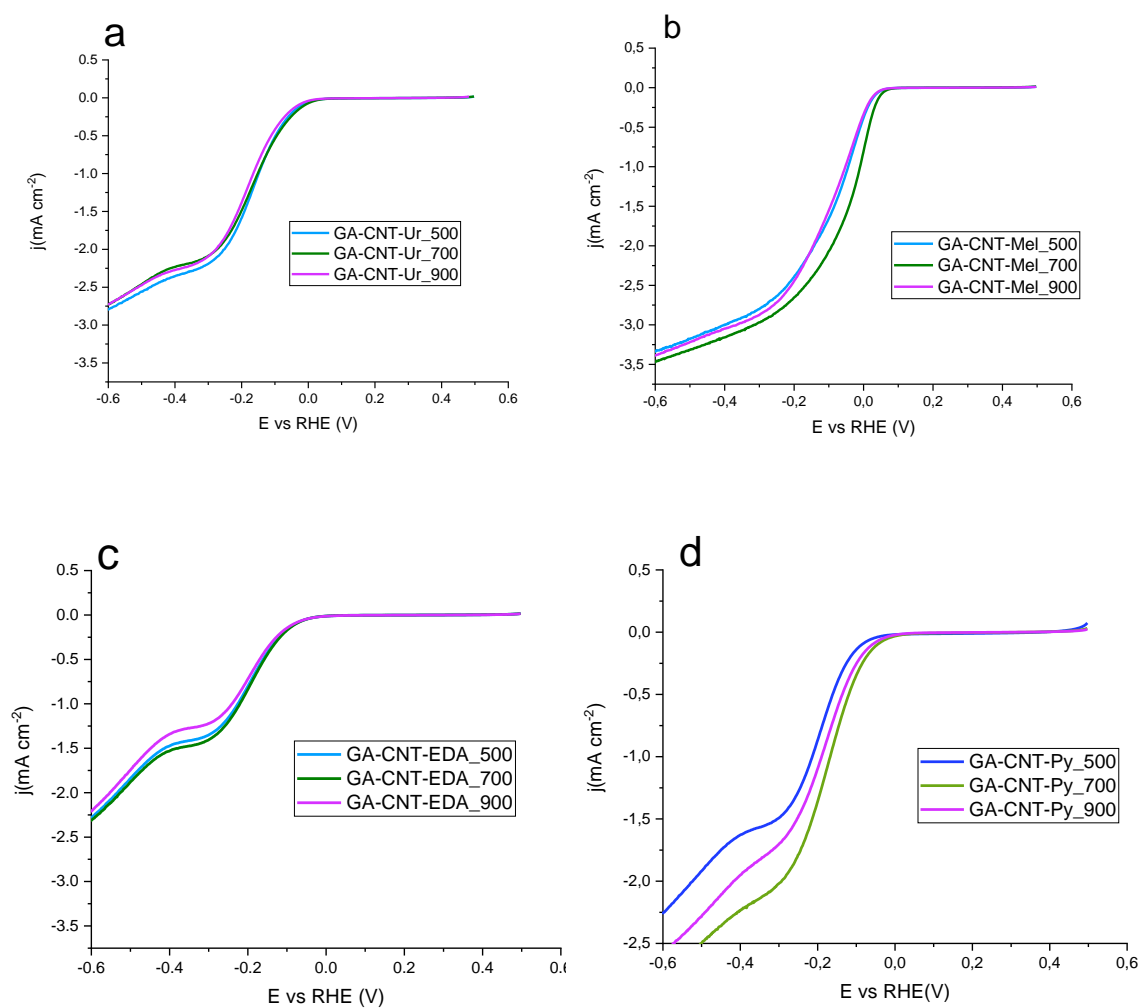

Figure S4. LSV curves for GA-CNT hybrids doped with different N-doping precursors and pyrolysed at three different temperatures 500, 700 and 900 °C: (a) Urea precursor; (b) melamine precursor; (c) Ethylene diamine precursor; (d) Pyrrol precursor.

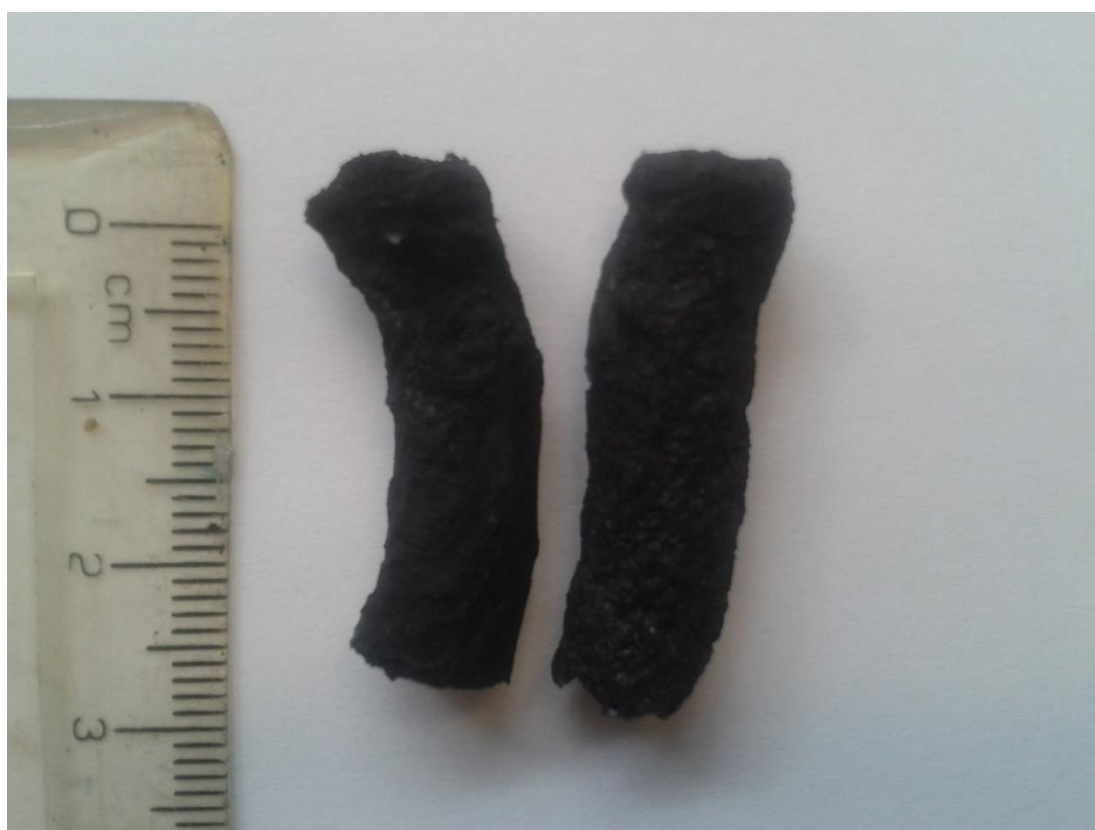

Figure S5. Digital photograph of GA-CNT aerogels with ethylenediamine

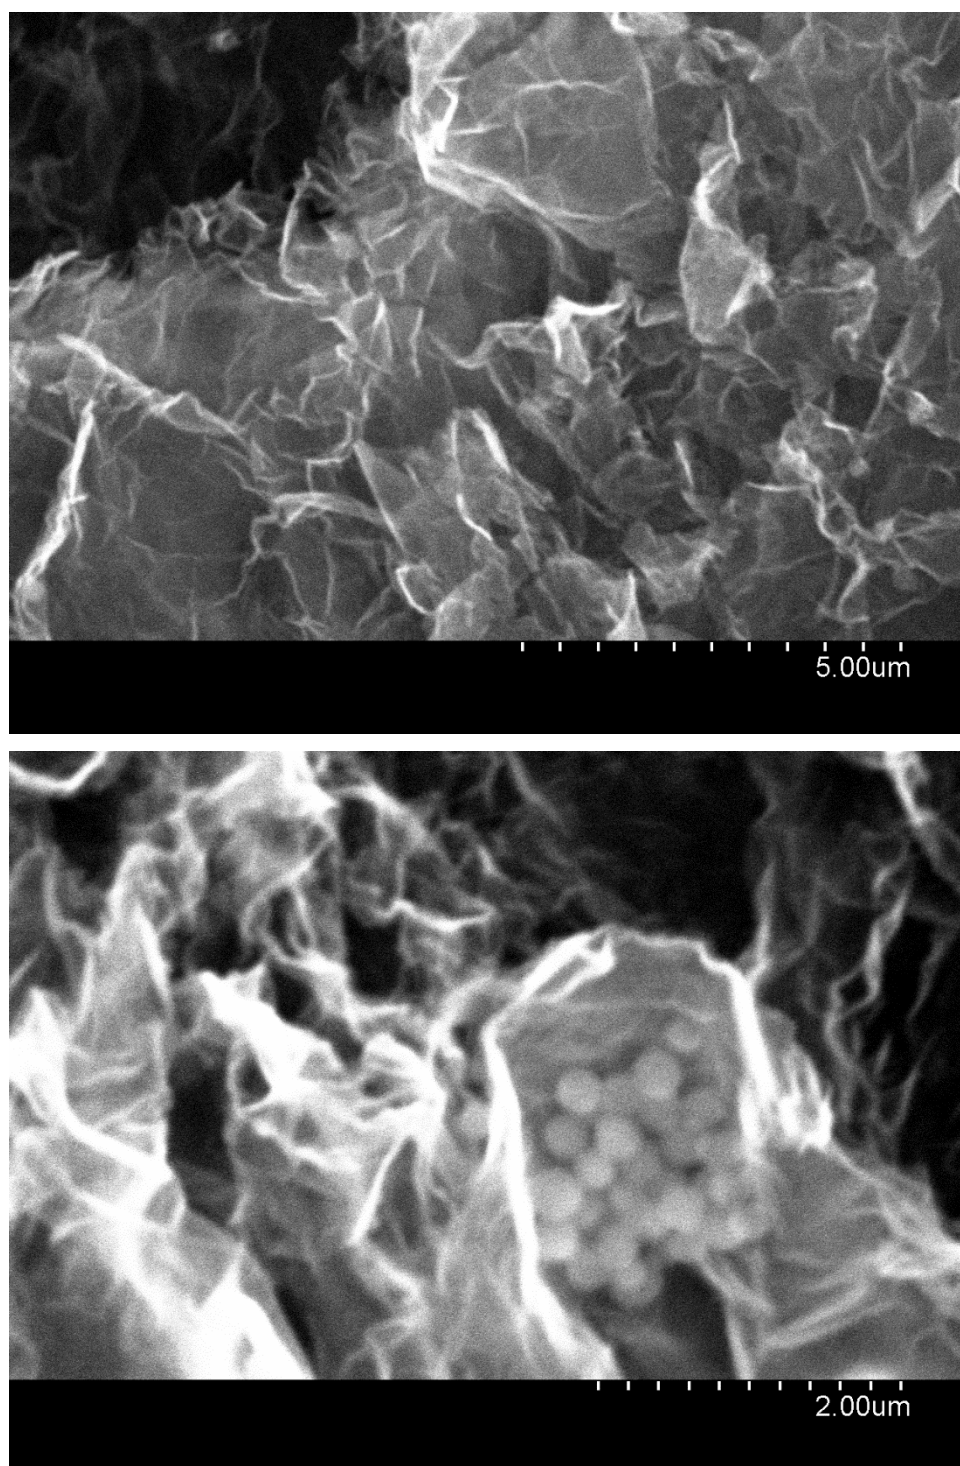

Figure S6. Representative SEM image of GA-CNT-Py\_700

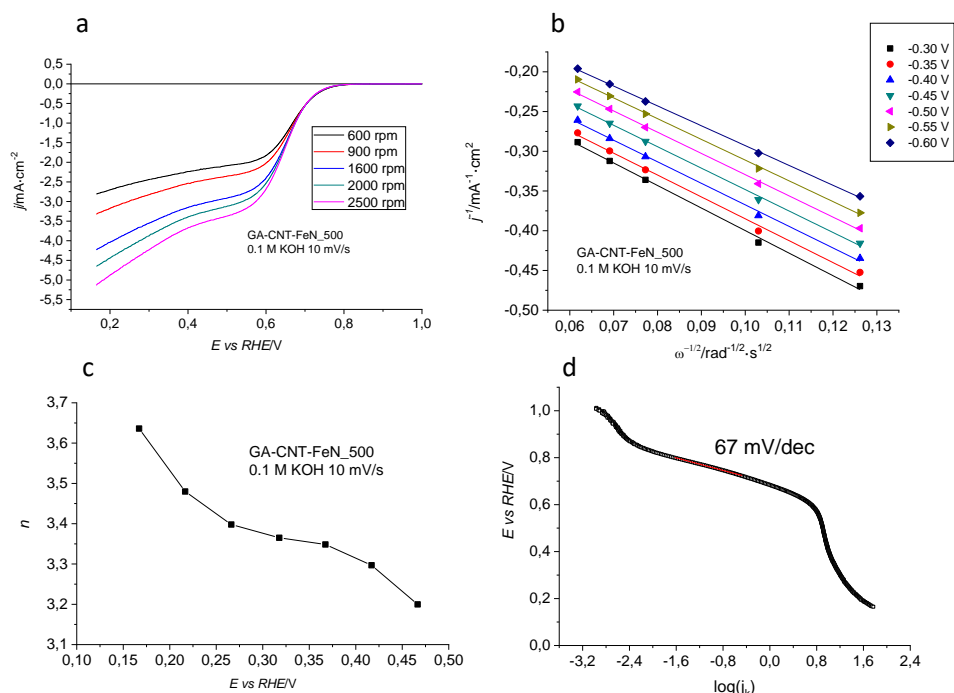

Figure S7. ORR electrochemical results for GA-CNT-FeN<sub>500</sub> CNT using RDE: (a) linear sweep voltammetry at different rotating speeds; (b) Koutecky–Levich plots; (c) number of electrons transferred; (d) Tafel plot

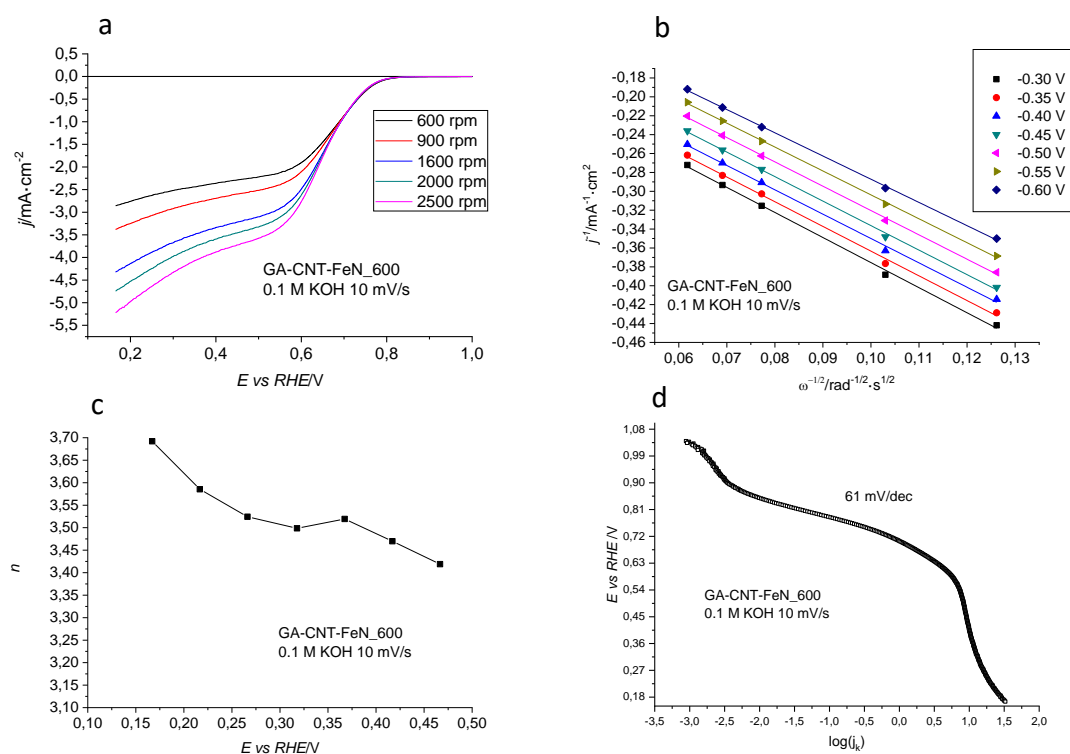

Figure S8. ORR electrochemical results for GA-CNT-FeN<sub>600</sub> CNT using RDE: (a) linear sweep voltammetry at different rotating speeds; (b) Koutecky–Levich plots; (c) number of electrons transferred; (d) Tafel plot

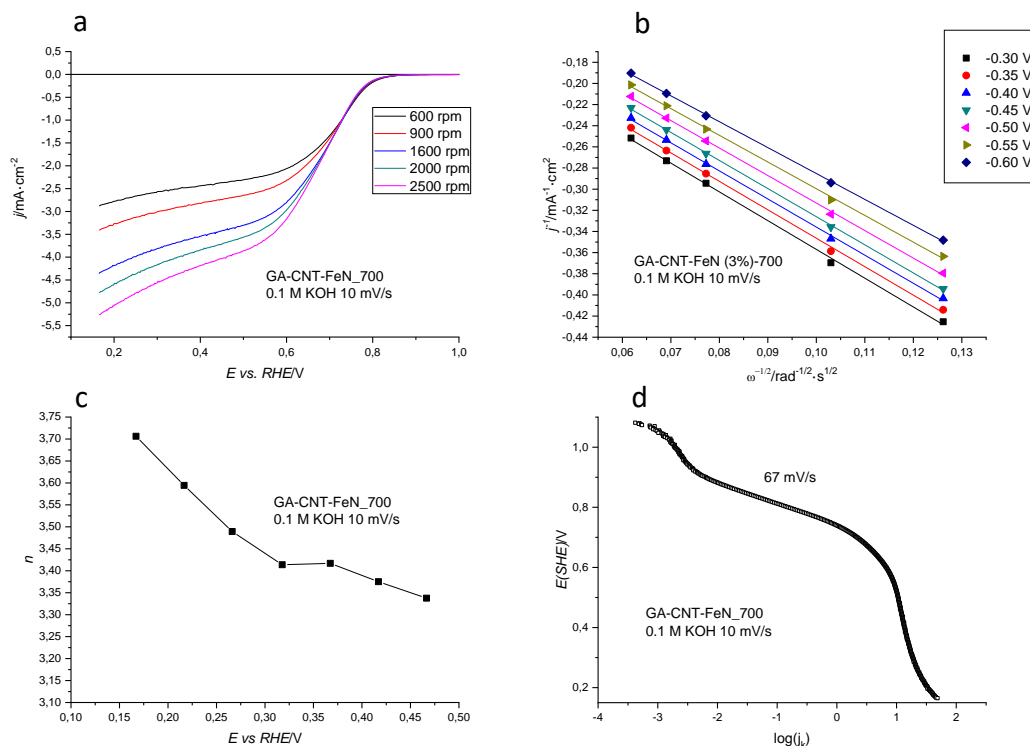

Figure S9. ORR electrochemical results for GA-CNT-FeN<sub>700</sub> CNT using RDE: (a) linear sweep voltammetry at different rotating speeds; (b) Koutecky–Levich plots; (c) number of electrons transferred; (d) Tafel plot

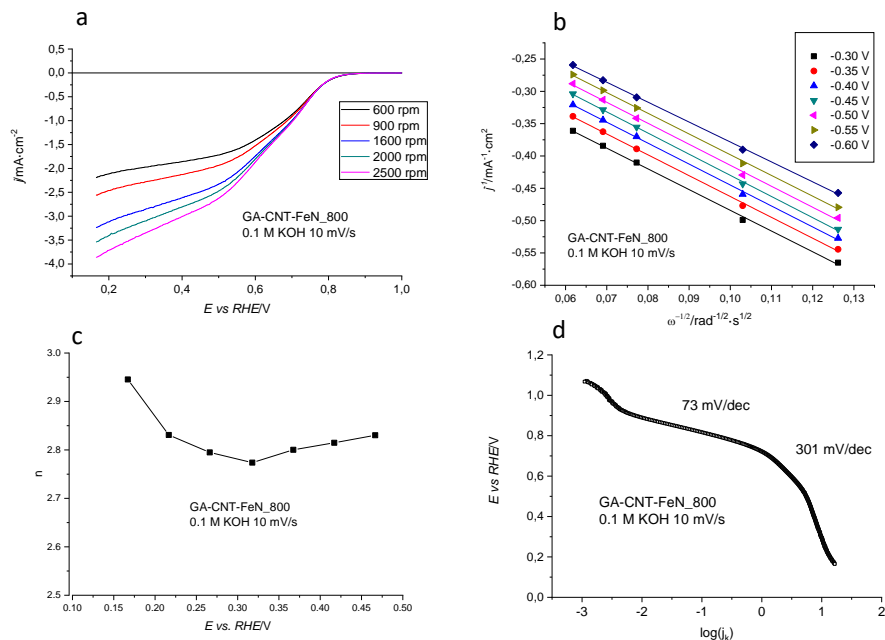

Figure S10. ORR electrochemical results for GA-CNT-FeN<sub>800</sub> CNT using RDE: (a) linear sweep voltammetry at different rotating speeds; (b) Koutecky–Levich plots; (c) number of electrons transferred; (d) Tafel plot



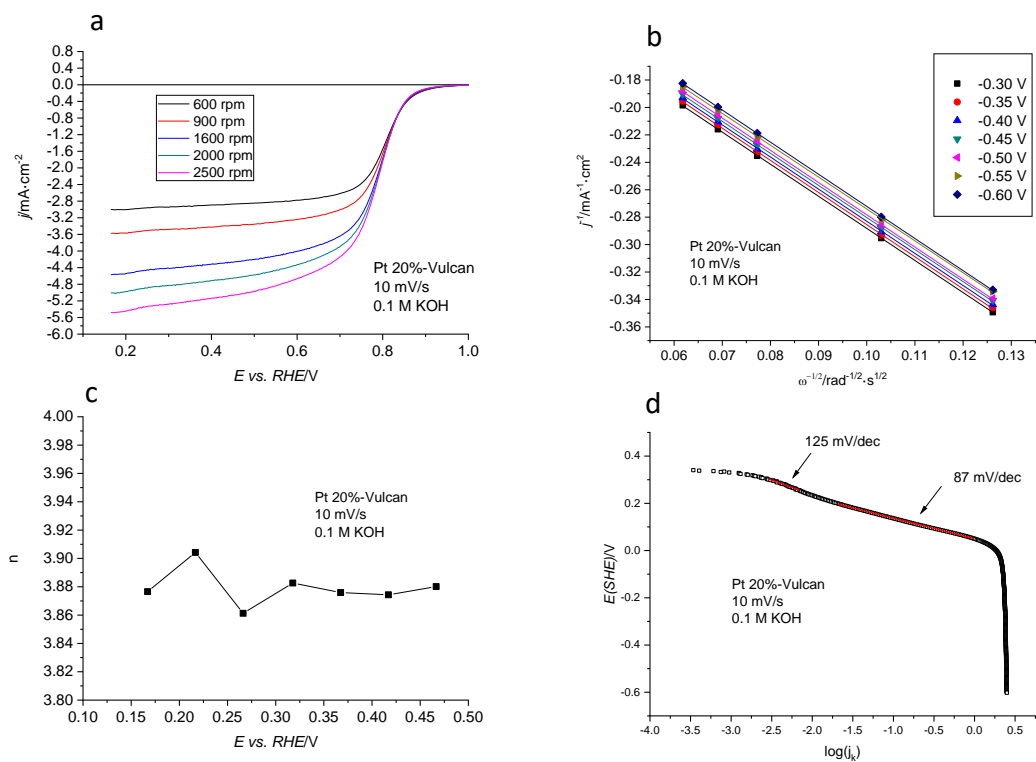

Figure S11. ORR electrochemical results for Pt 20%-Vulcan using RDE: (a) linear sweep voltammetry at different rotating speeds; (b) Koutecky–Levich plots; (c) number of electrons transferred; (d) Tafel plot

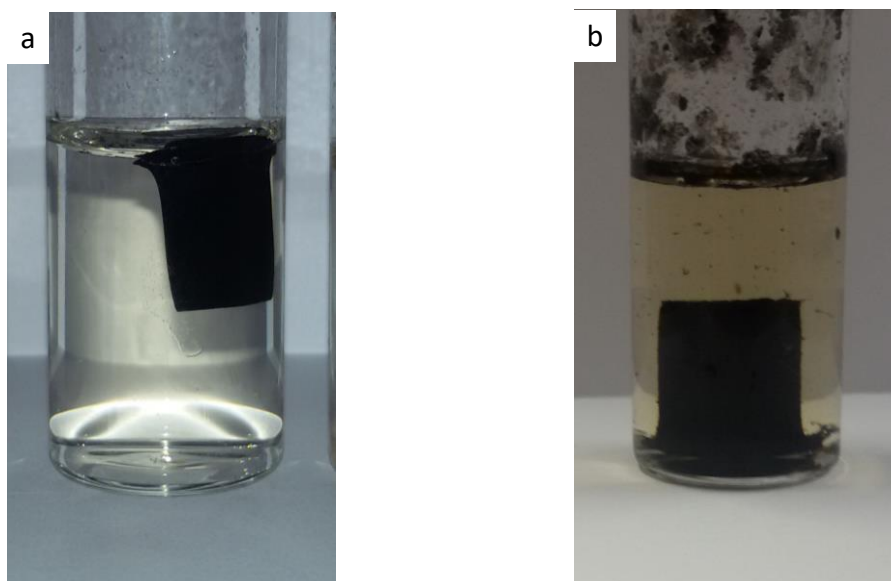

**Figure S12.** Hydrogel after hydrothermal synthesis: (a) in the absence of Fe phenanthroline and (b) in the presence of Fe phenanthroline

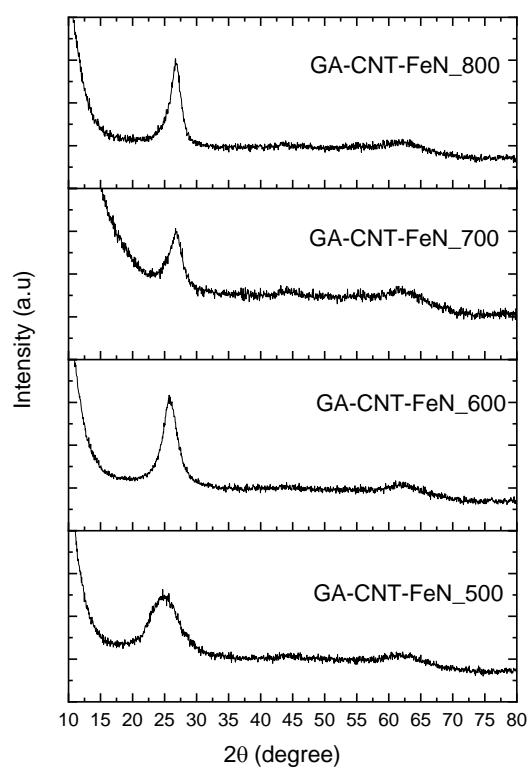

**Figure S13.** XRD of the composites with Fe

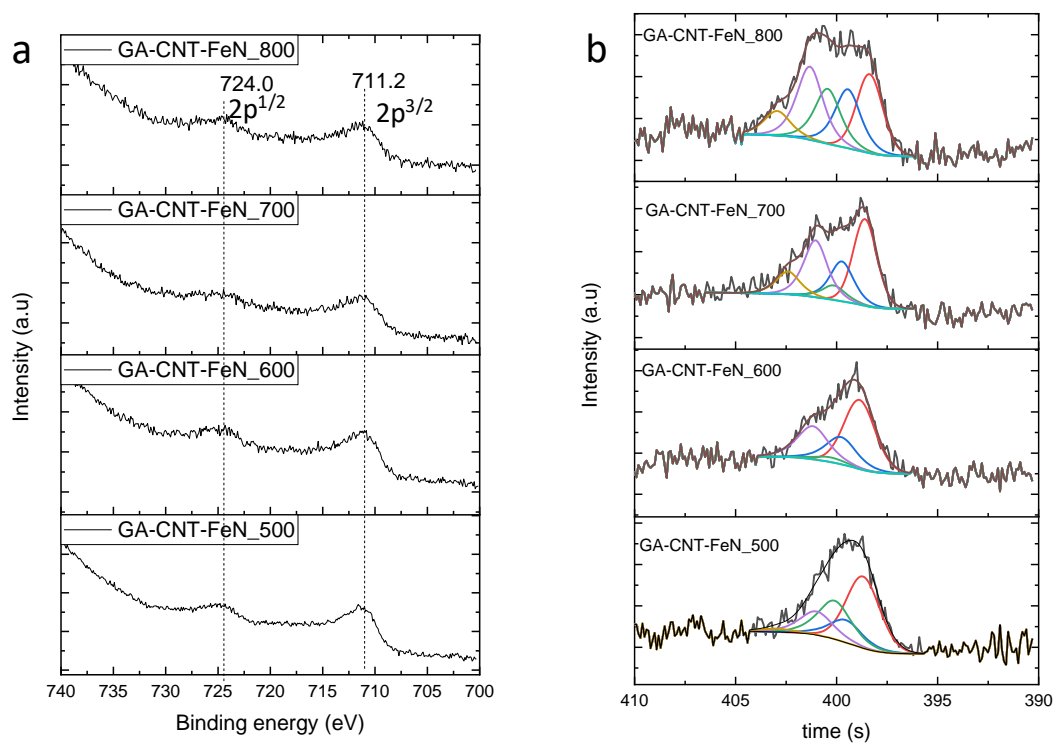

**Figure S14.** XPS spectra of Fe 2p and 1 deconvolution of the N1s XPS core level spectra

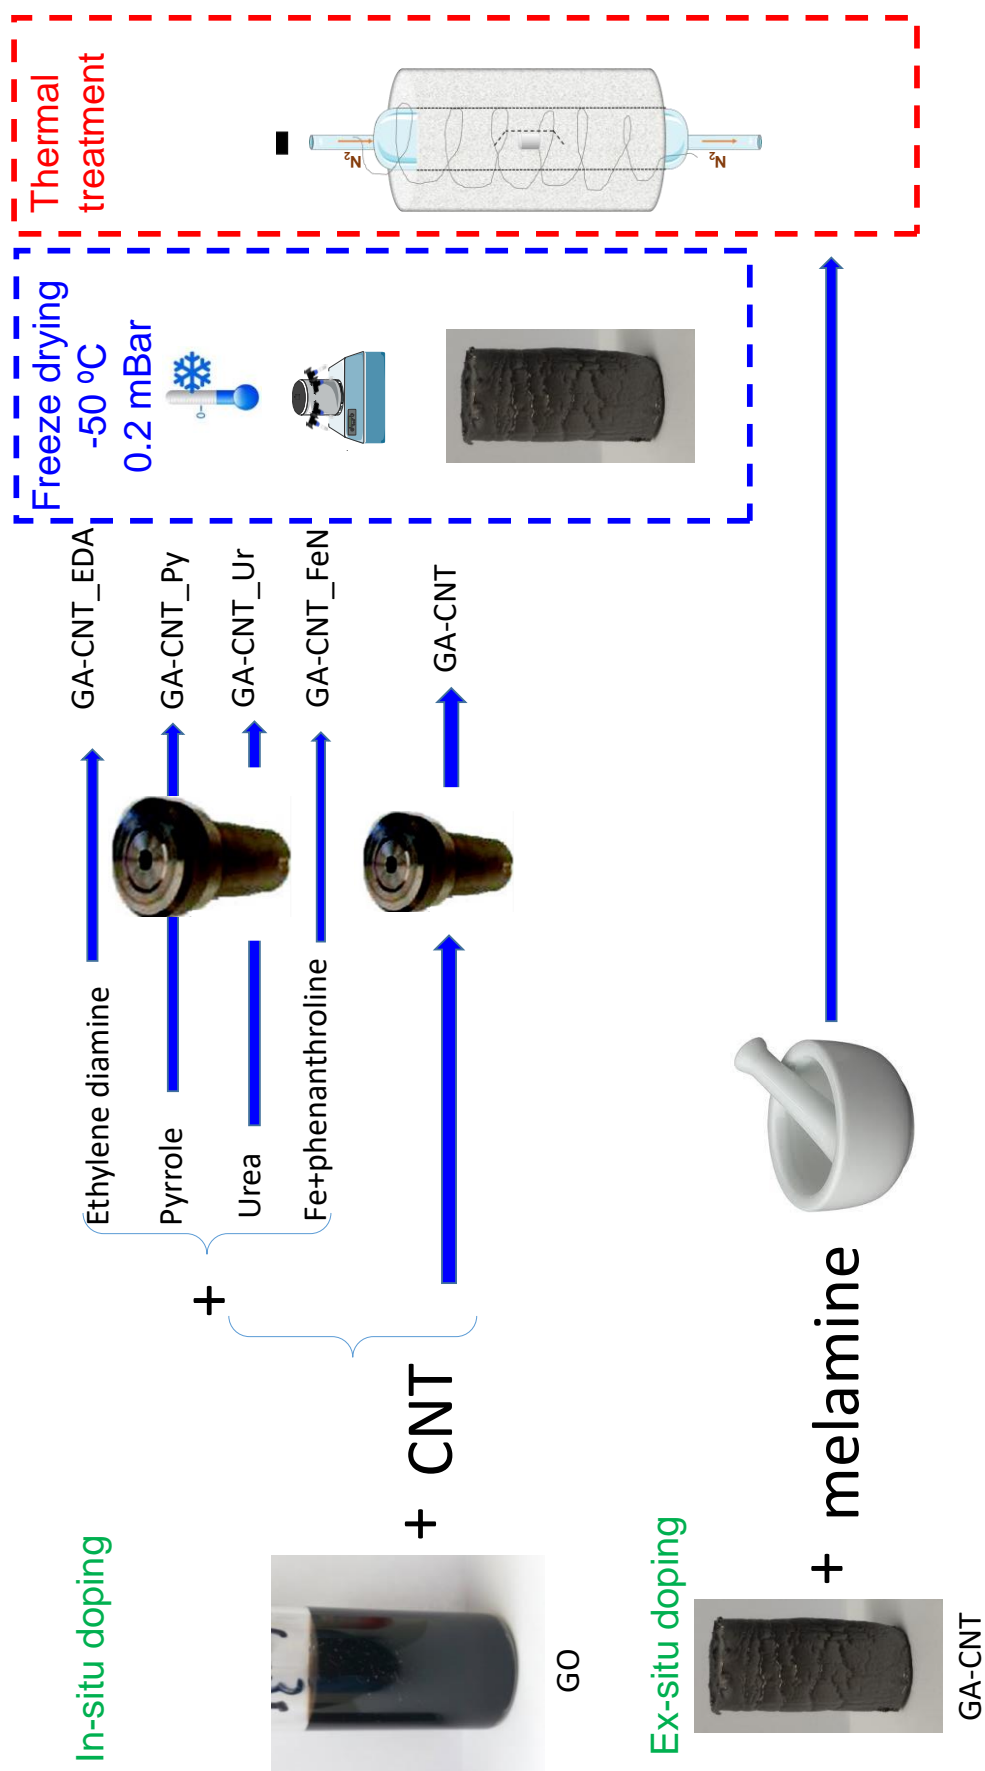

**Figure S15.** Scheme of the preparation of the different electrocatalysts

**Table S1. Graphene aerogel-CNT hybrid doped with nitrogen and metal**

| sample            | Treatment temperature<br><br>℃ | Onset potential<br><br>V | Limiting current, $j_k$<br><br>(mA/cm <sup>2</sup> ) | Number of electrons | Tafel slope<br><br>(mV/dec) |
|-------------------|--------------------------------|--------------------------|------------------------------------------------------|---------------------|-----------------------------|
| 20%Pt/vulcanXC-72 | -                              | 0.96                     | -23.19                                               | 3.9                 | 87                          |
| GA-CNT-FeN        | 500                            | 0.80                     | -16.1                                                | 3.6                 | 67                          |
| GA-CNT-FeN        | 600                            | 0.83                     | -16.0                                                | 3.7                 | 61                          |
| GA-CNT-FeN        | 700                            | 0.86                     | -18.9                                                | 3.7                 | 67                          |
| GA-CNT-FeN        | 800                            | 0.86                     | -11.2                                                | 2.9                 | 73                          |

## References

- [1] R. Hudson, A. Rivière, C.M. Cirtiu, K.L. Luska, A. Moores, Iron-iron oxide core-shell nanoparticles are active and magnetically recyclable olefin and alkyne hydrogenation catalysts in protic and aqueous media, *Chem. Commun.* 48 (2012) 3360–3362. <https://doi.org/10.1039/C2CC16438H>.
- [2] F.A. Westerhaus, R.V. Jagadeesh, G. Wienhöfer, M.-M. Pohl, J. Radnik, A.-E. Surkus, J. Rabeah, K. Junge, H. Junge, M. Nielsen, A. Brückner, M. Beller, Heterogenized cobalt oxide catalysts for nitroarene reduction by pyrolysis of molecularly defined complexes, *Nat. Chem.* 5 (2013) 537–543. <https://doi.org/10.1038/nchem.1645>.
